# Supplementary material for: Hempseed Lignanamides Rich-Fraction: Chemical Investigation and Cytotoxicity towards U-87 Glioblastoma Cells
Source: PubMed Central journal article supplement (PMC7179246; doi:10.3390/molecules25051049), 2020-02-26
Supplement: molecules-25-01049-s001.pdf [file molecules-25-01049-s001.pdf]

Supplementary Information

# Hempseed Lignanamides Rich-Fraction: Chemical Investigation and Cytotoxicity towards U-87 Glioblastoma Cells

Ersilia Nigro <sup>1,2,†</sup>, Giuseppina Crescente <sup>1,†</sup>, Marialuisa Formato <sup>1,†</sup>, Maria Tommasina Pecoraro <sup>1</sup>, Marta Mallardo <sup>1,2</sup>, Simona Piccolella <sup>1</sup>, Aurora Daniele <sup>1,2</sup> and Severina Pacifico <sup>1,\*</sup>

<sup>1</sup> Department of Environmental Biological and Pharmaceutical Sciences and Technologies, University of Campania "Luigi Vanvitelli", Via Vivaldi 43, I-81100 Caserta, Italy; nigro@ceinge.unina.it (E.N.); giuseppina.crescente@unicampania.it (G.C.); marialuisa.formato@unicampania.it (M.F.); mariatommasina.pecoraro@unicampania.it (M.T.P.); marta.mallardo@unicampania.it (M.M.); simona.piccolella@unicampania.it (S.P.); aurora.daniele@unicampania.it (A.D.)

<sup>2</sup> CEINGE-Advanced Biotechnologies, Scarl, 80131 Napoli, Italy

<sup>†</sup> These authors equally contributed to the work

\* Correspondence: severina.pacifico@unicampania.it; Tel.: +39-0823-274578

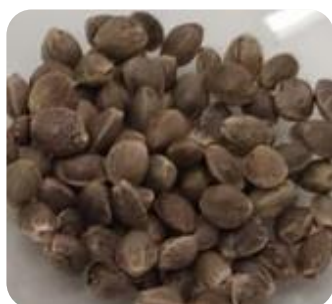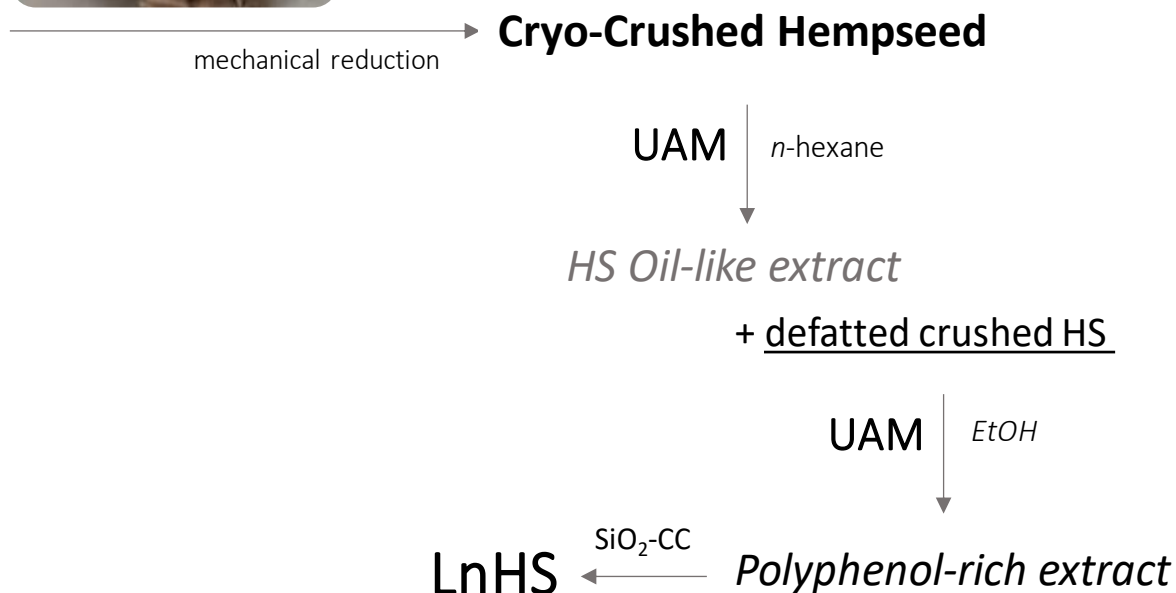

**Figure 1.** Simplified extraction and fractionation scheme of cryo-crushed hempseeds.

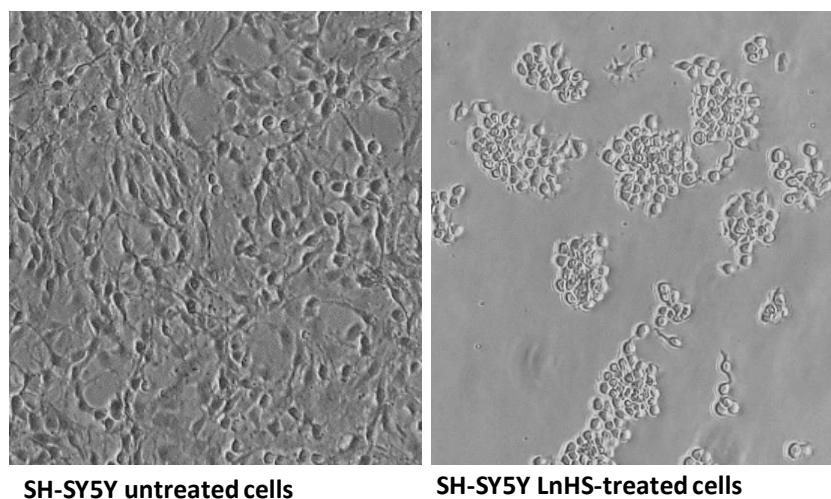

**Figure 2.** Morphological changes in SH-SY5Y cells treated with LnHS fraction in respect to untreated cells. Representative images were acquired by Inverted Phase Contrast Brightfield Zeiss Primo Vert Microscope.

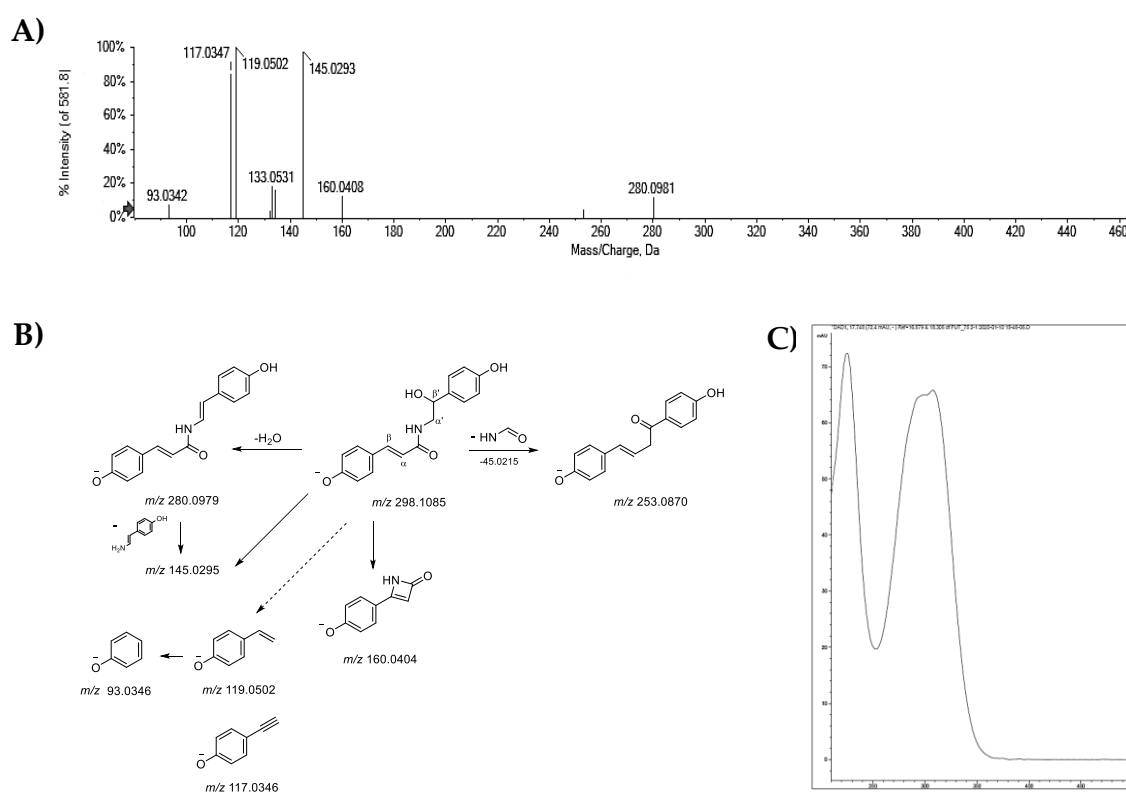

**Figure 3.** A) TOF-MS/MS spectrum; B) proposed fragmentation pathway of the  $[M-H]^-$  ion; C) UV-DAD spectrum for compound **2**. In B panel, the theoretical  $m/z$  value is reported below each structure.

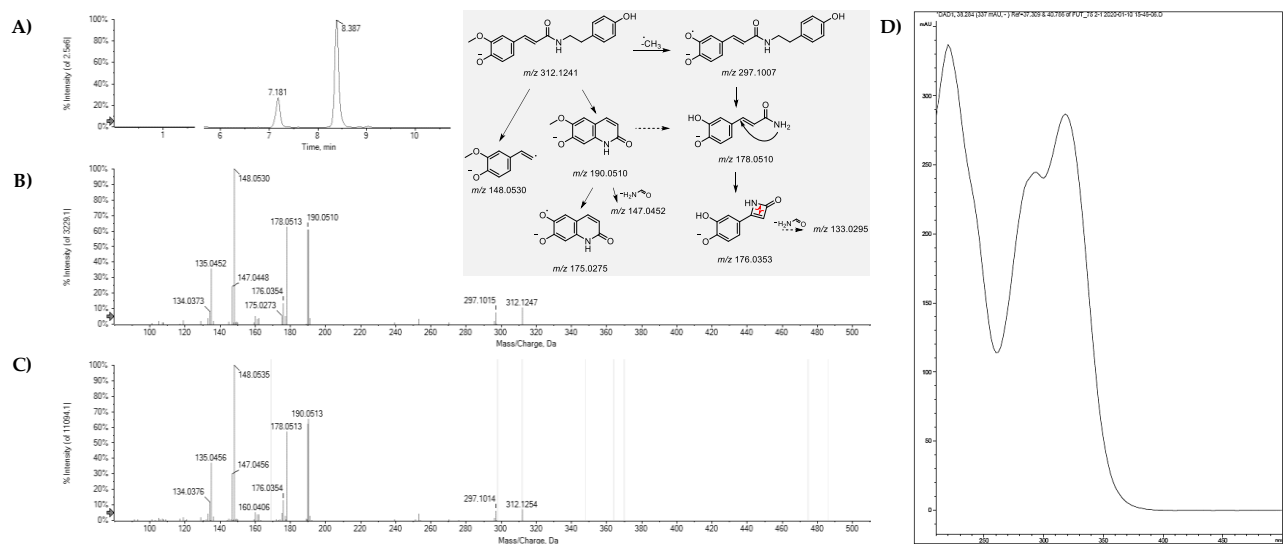

**Figure 4.** A) Extracted ion chromatogram (XIC) of the  $[M-H]^-$  ion at  $m/z$   $312.124 \pm 0.025$ ; TOF-MS/MS spectra of B) compound **8**, and C) compound **17**. In the grey panel the tentatively proposed fragmentation pathway of the  $[M-H]^-$  ions. Representative UV-DAD spectrum, acquired under peak **17**, is reported in panel D.

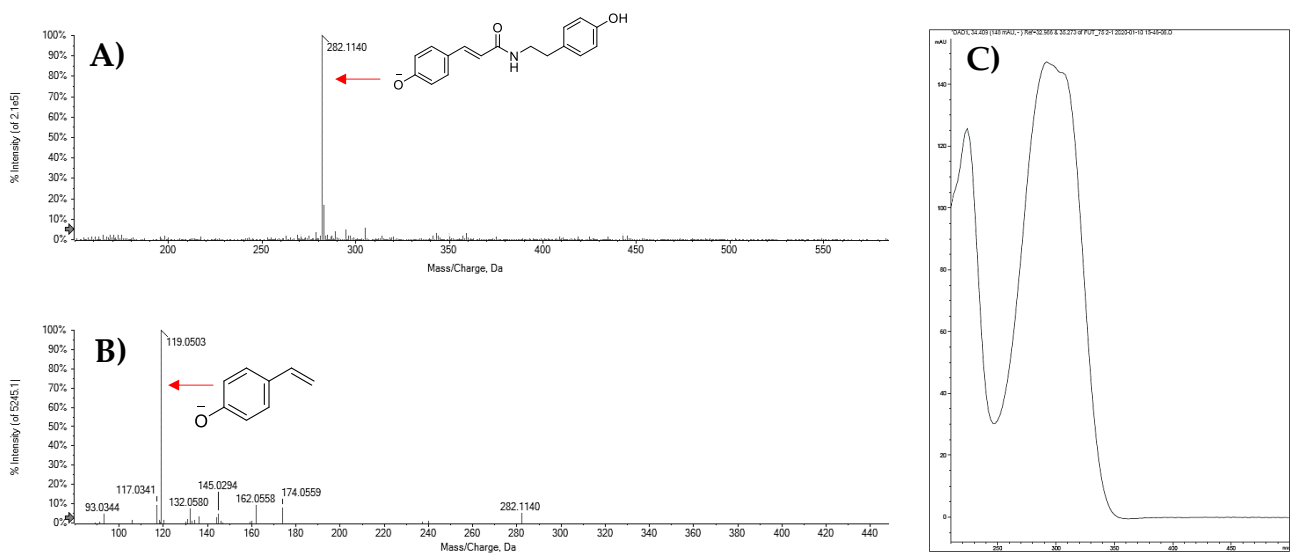

**Figure 5.** A) TOF-MS spectrum for compound **11**; B) TOF MS/MS spectrum of the  $[M-H]^-$  ion; C) UV-DAD spectrum.

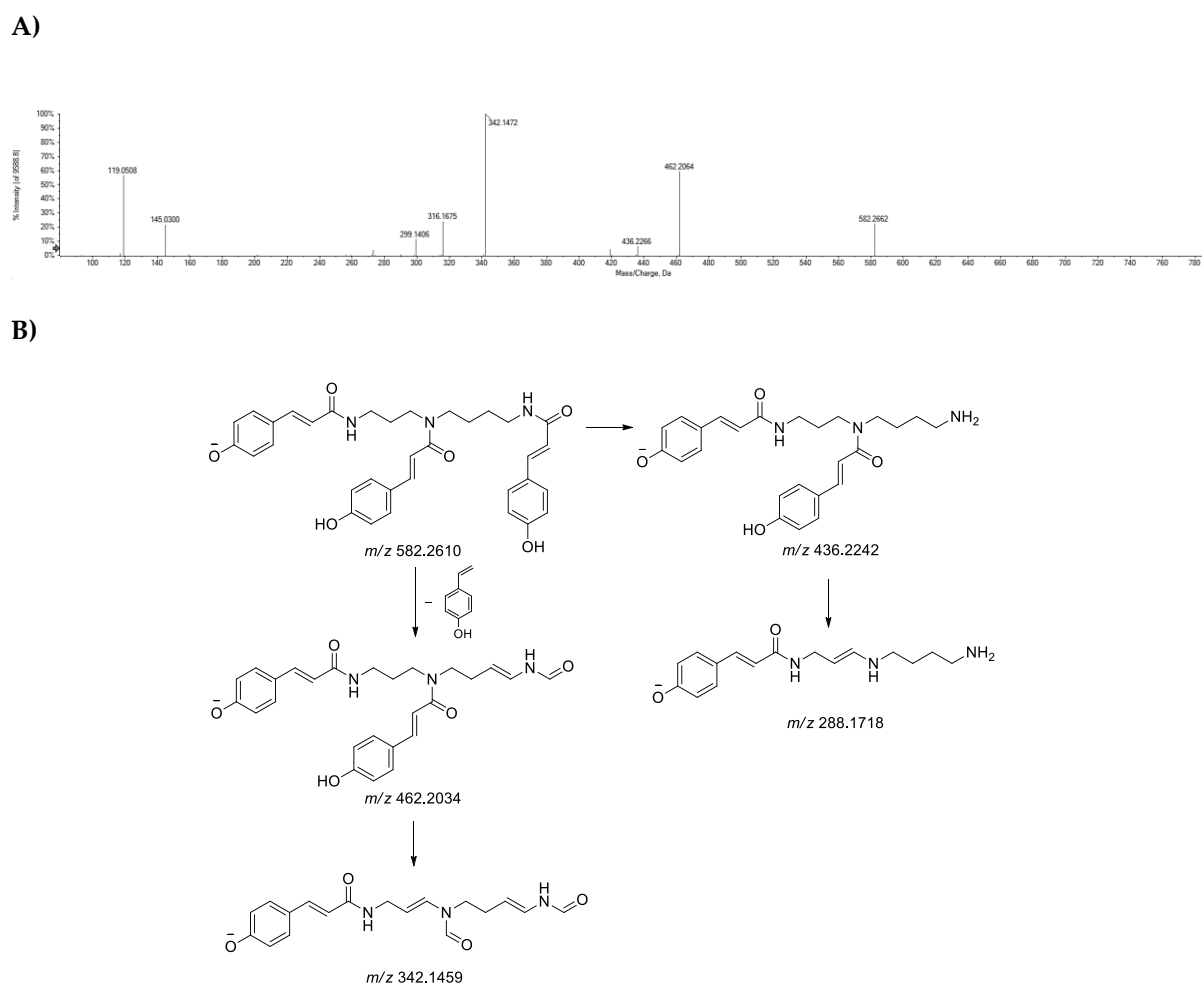

**Figure 6.** A) TOF-MS/MS spectrum and B) proposed fragmentation pathway of the  $[M-H]^-$  ion for compound **33**; theoretical  $m/z$  values are reported below each structure.

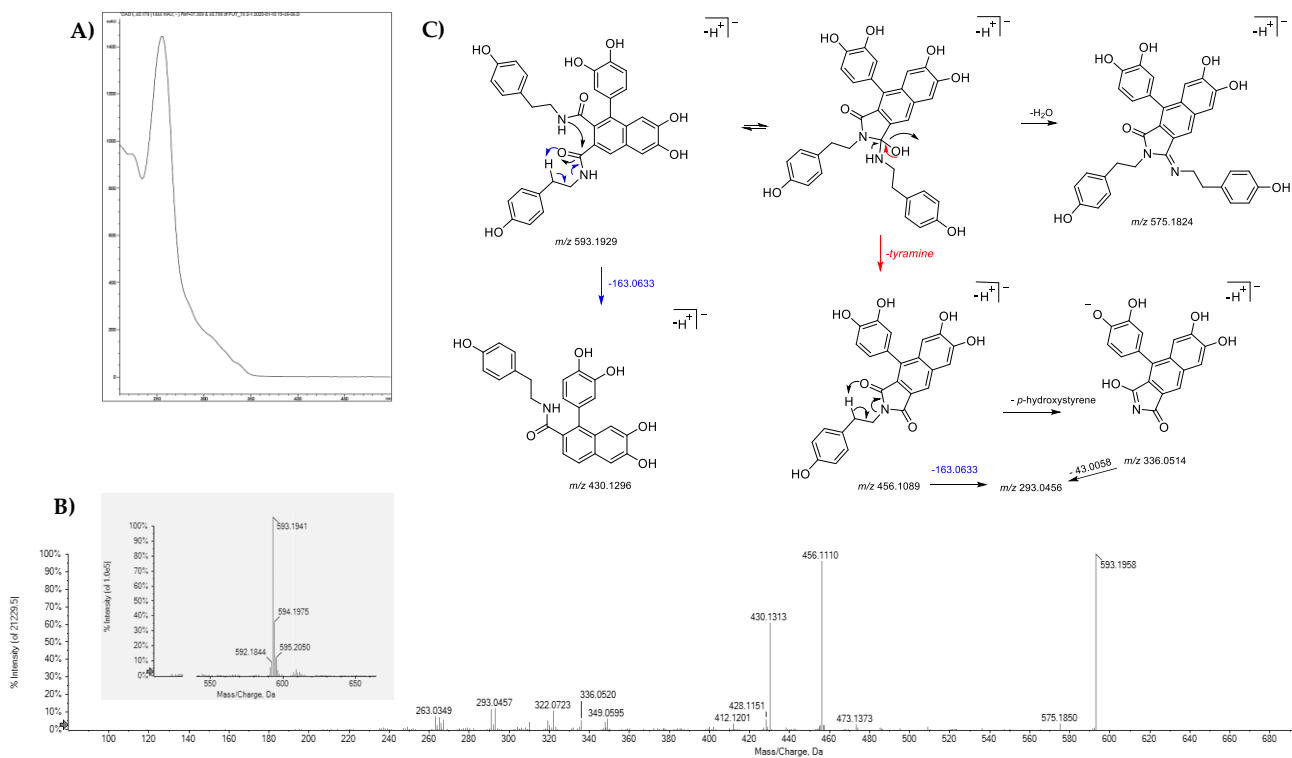

**Figure 7.** Compound **16** A) UV-DAD spectrum; B) TOF-MS/MS spectrum (in grey panel TOF-MS spectrum is reported). C) Proposed fragmentation pathway of the  $[M-H]^-$  ion (theoretical  $m/z$  values are reported below each structure).

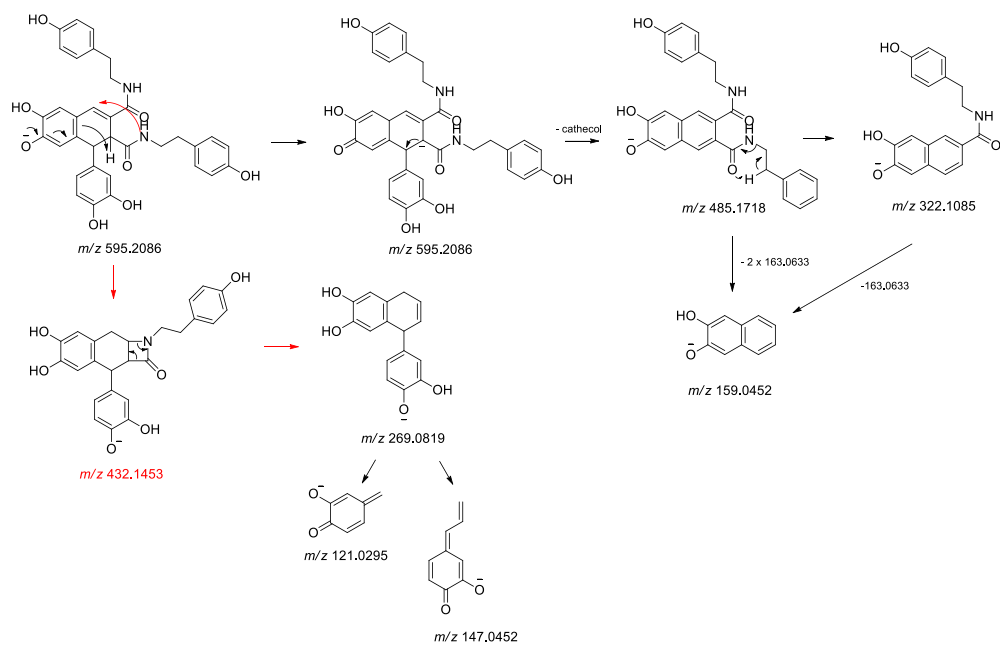

**Figure 8.** Proposed fragmentation pathway of the  $[M-H]^-$  ion relative to cannabisin B isomers (theoretical  $m/z$  values are reported below each structure).

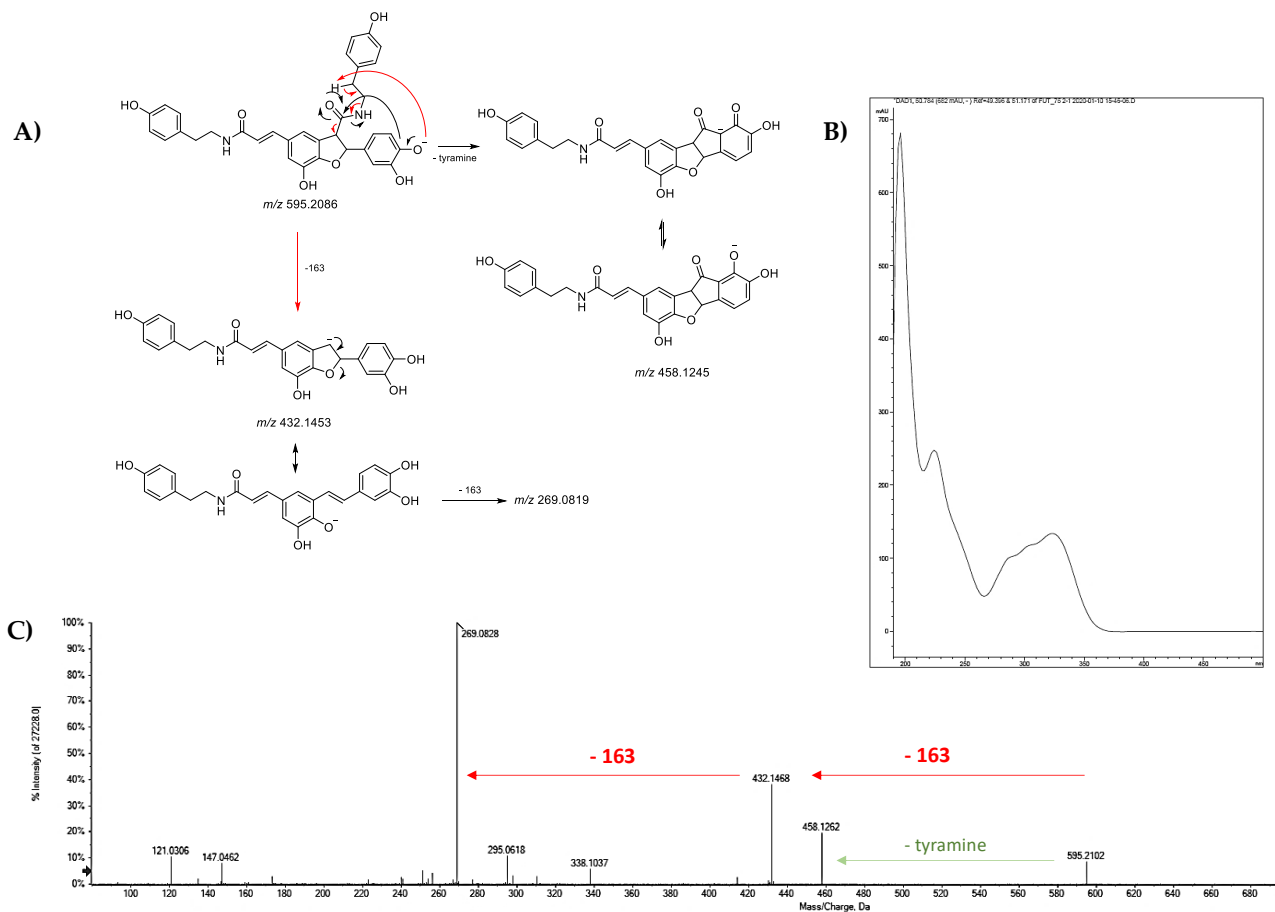

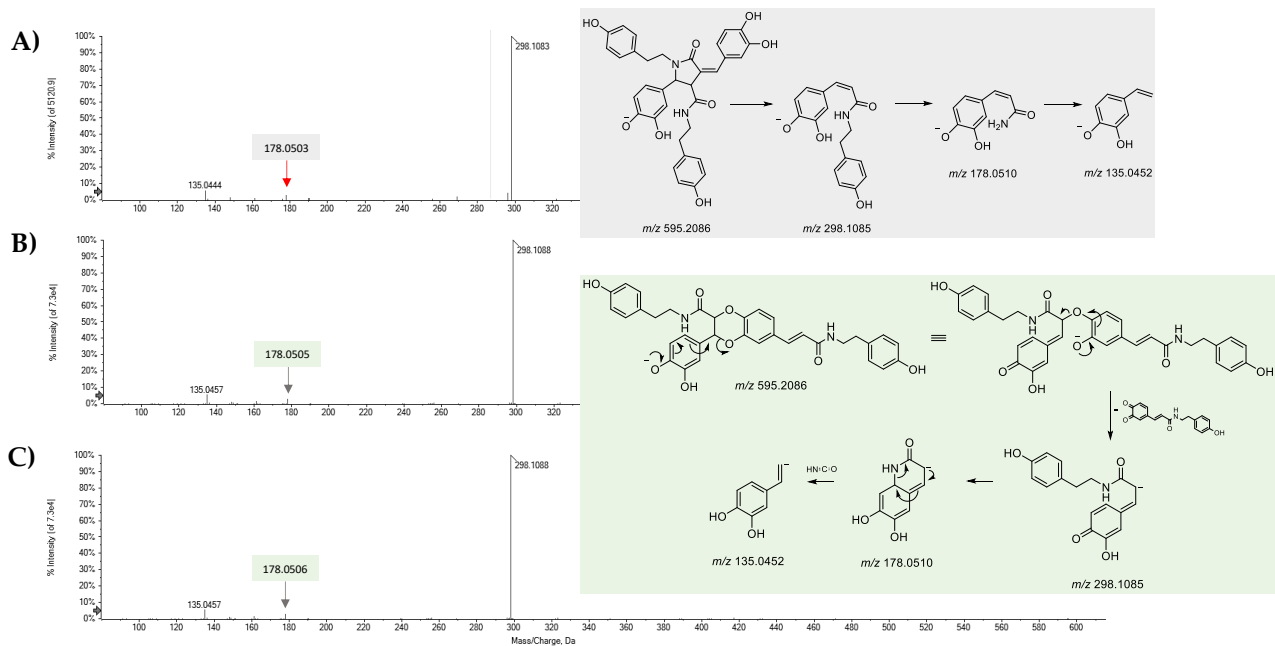

**Figure 10.** TOF-MS/MS spectra of compounds **32**, **36** and **38** (A, B, and C, respectively). Proposed fragmentation pathway of the  $[M-H]^-$  ion of the compound **32** is reported in grey panel, whereas that of **36** and **38** is in light green panel (theoretical  $m/z$  values are reported below each structure).



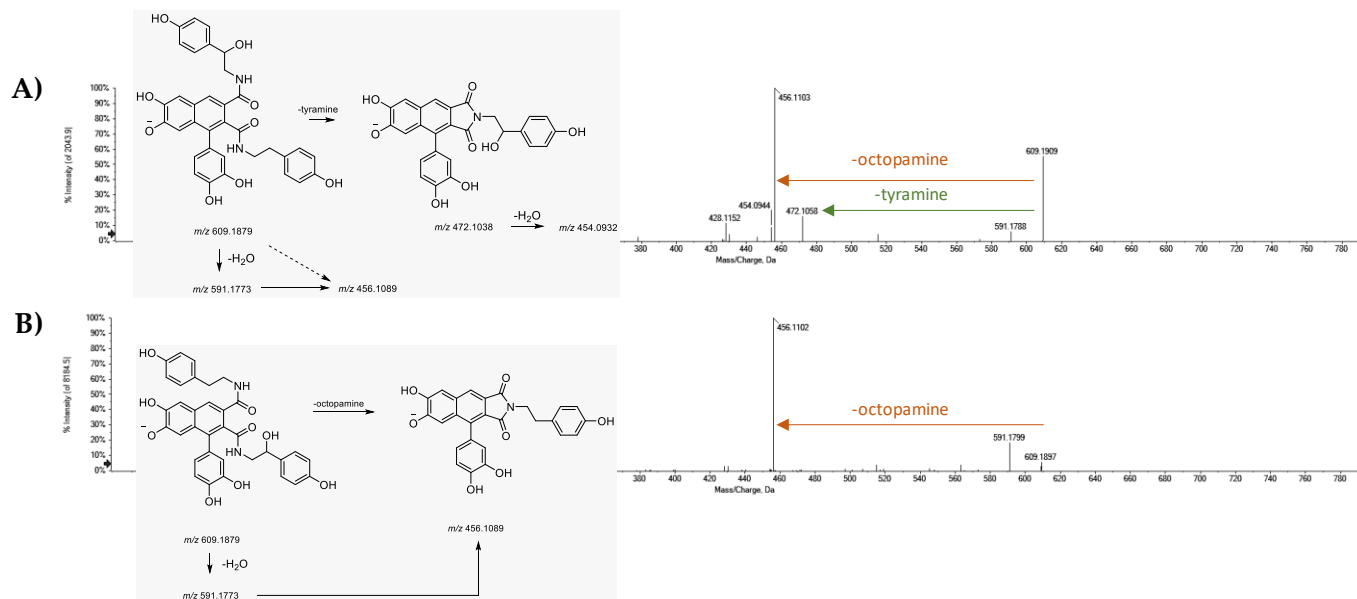

**Figure 11.** TOF-MS/MS spectra of compounds 4 and 6 (A, and B, respectively). Proposed fragmentation pathway of the [M-H]<sup>-</sup> ion of both the compounds are reported in grey panels (theoretical *m/z* values are reported below each structure).

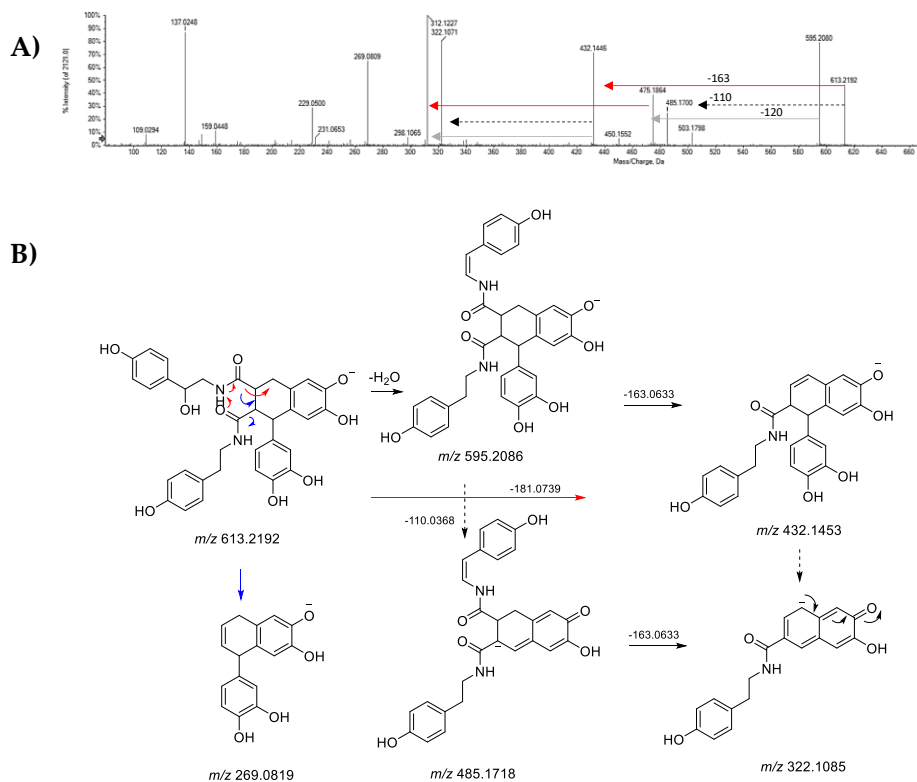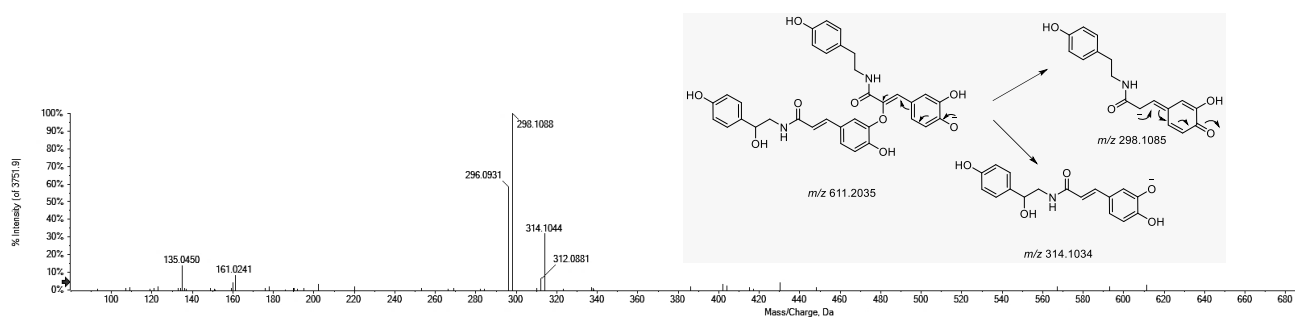

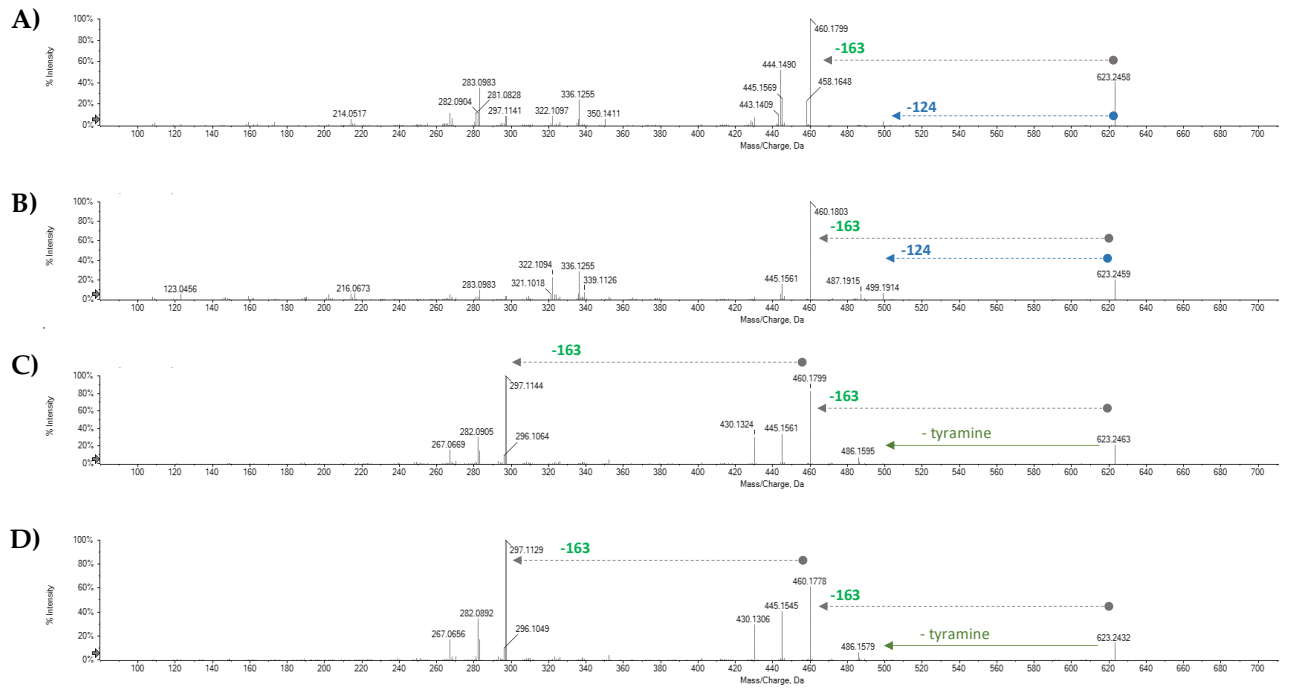

**Figure 14.** TOF-MS/MS spectra of compounds A) 27, B) 29, C) 37, and D) 39.

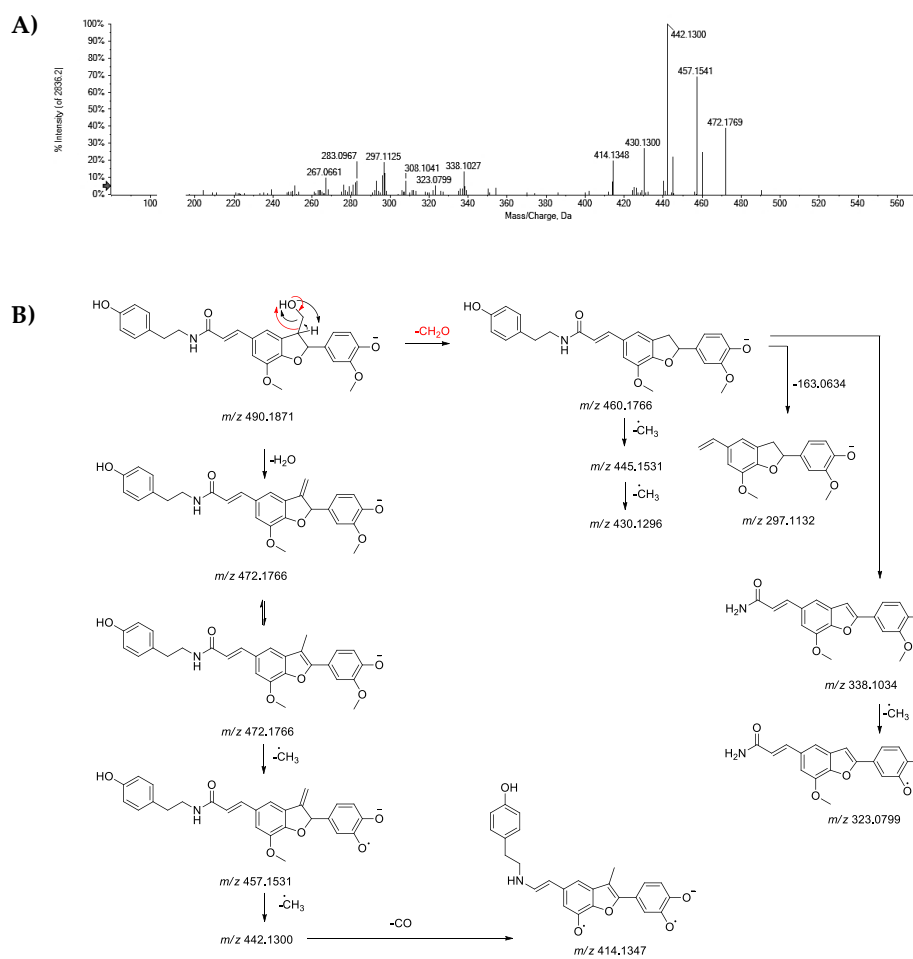

**Figure 15.** A) TOF-MS/MS spectrum of compound **30**, and B) proposed fragmentation pathway of its  $[M-H]^-$  ion (theoretical  $m/z$  values are reported below each structure).

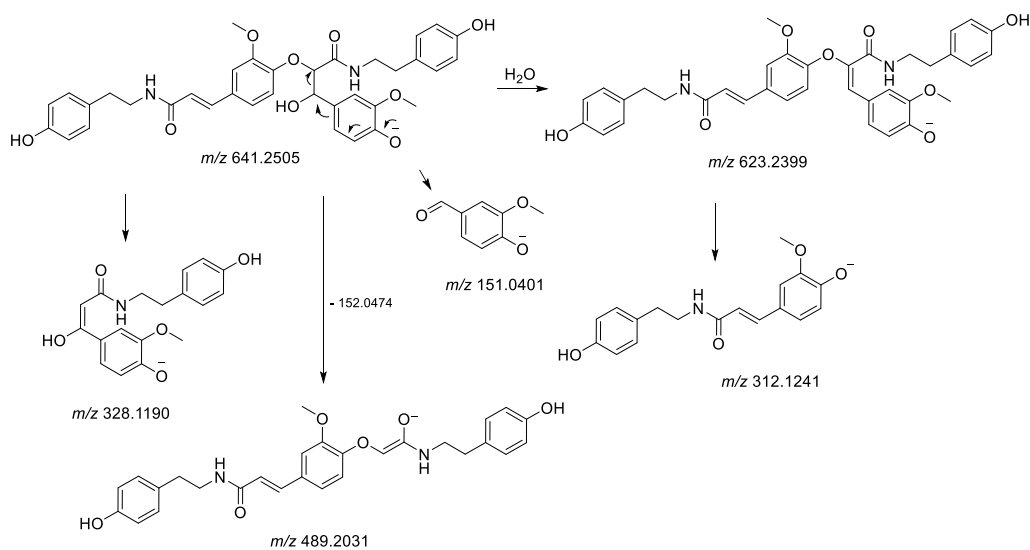

**Figure 16.** Proposed fragmentation pathway of the  $[M-H]^-$  ion for compounds **31** and **34**.

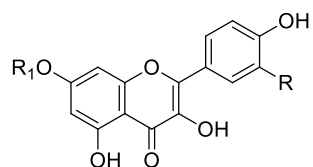

- 3** R = OH; R<sub>1</sub> = pentose
- 7** R = OH; R<sub>1</sub> = deoxyhexose
- 9** R = H; R<sub>1</sub> = pentose
- 10** R = H; R<sub>1</sub> = pentose
- 12** R = H; R<sub>1</sub> = deoxyhexose
- 14** R = H; R<sub>1</sub> = deoxyhexose
- 18** R = OH; R<sub>1</sub> = acetyldeoxyhexose

**Figure 17.** Flavanol glycosides in LnHS hempseed fraction.

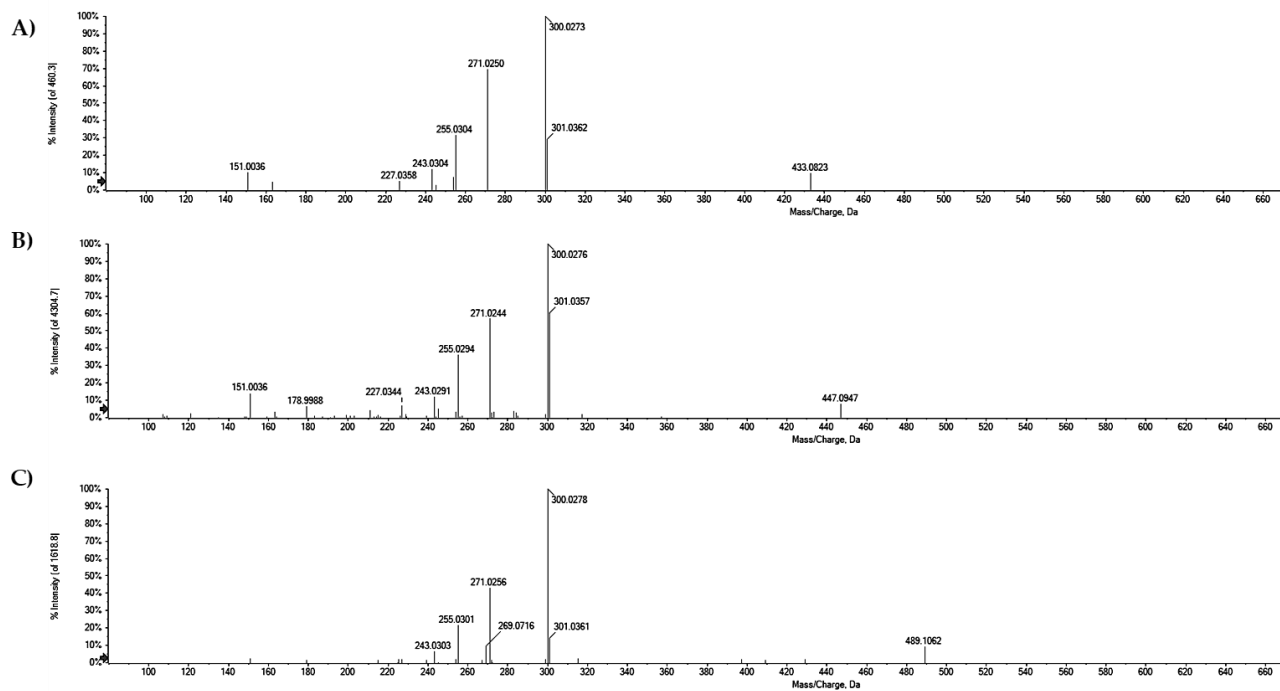

**Figure 18.** TOF-MS/MS spectra of quercetin derivatives A) 3, B) 7 and C) 18.

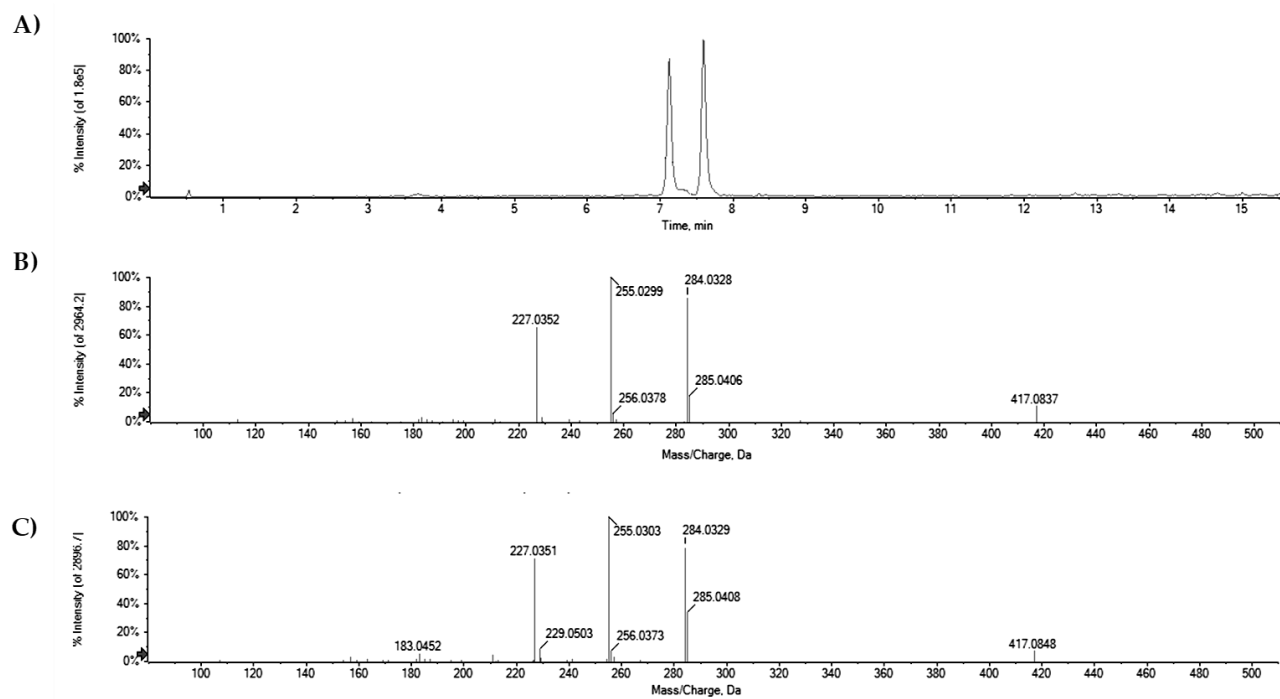

**Figure 19.** A) Extracted ion chromatogram (XIC) of the  $[M-H]^-$  ion at  $m/z$   $417.083 \pm 0.025$ ; TOF-MS/MS spectra of B) compound **9**, and C) compound **10**.

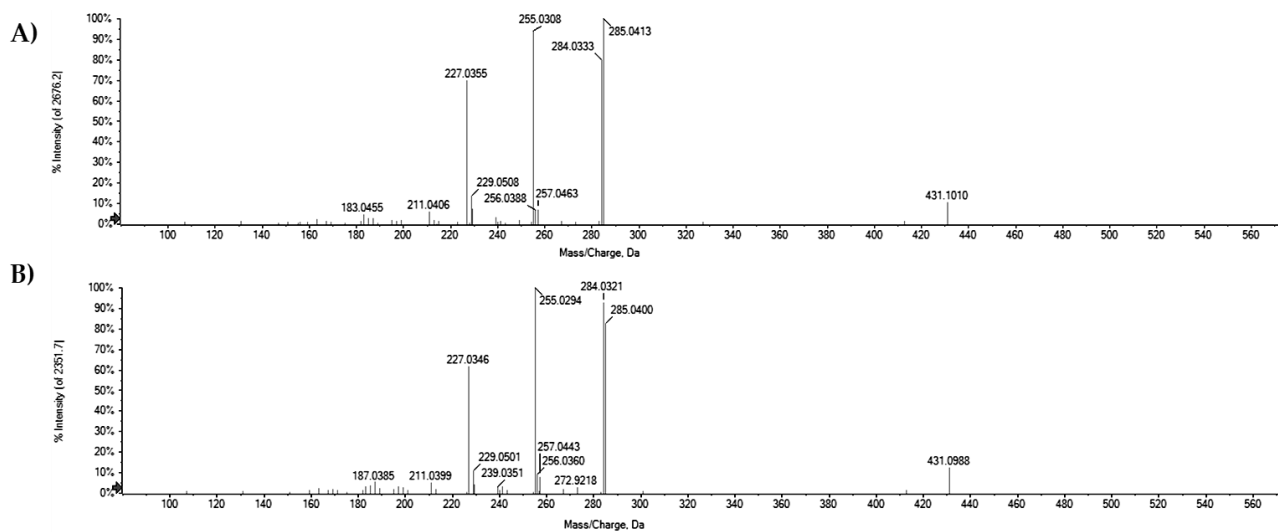

**Figure 20.** TOF-MS/MS spectra of kaempferol derivatives A) 12, and B) 14.

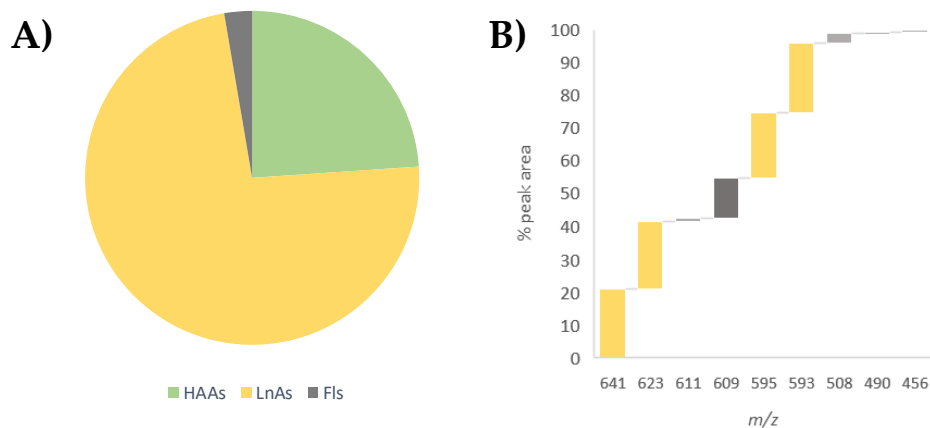

**Figure 21.** A) Relative content of each class of the tentatively identified compounds: HAAs – hydroxycinnamoyl amides; LnAs – lignanamides; Fls – Flavonols; B) Relative content of lignanamides sharing a common [M-H] ion in LnHS fraction.



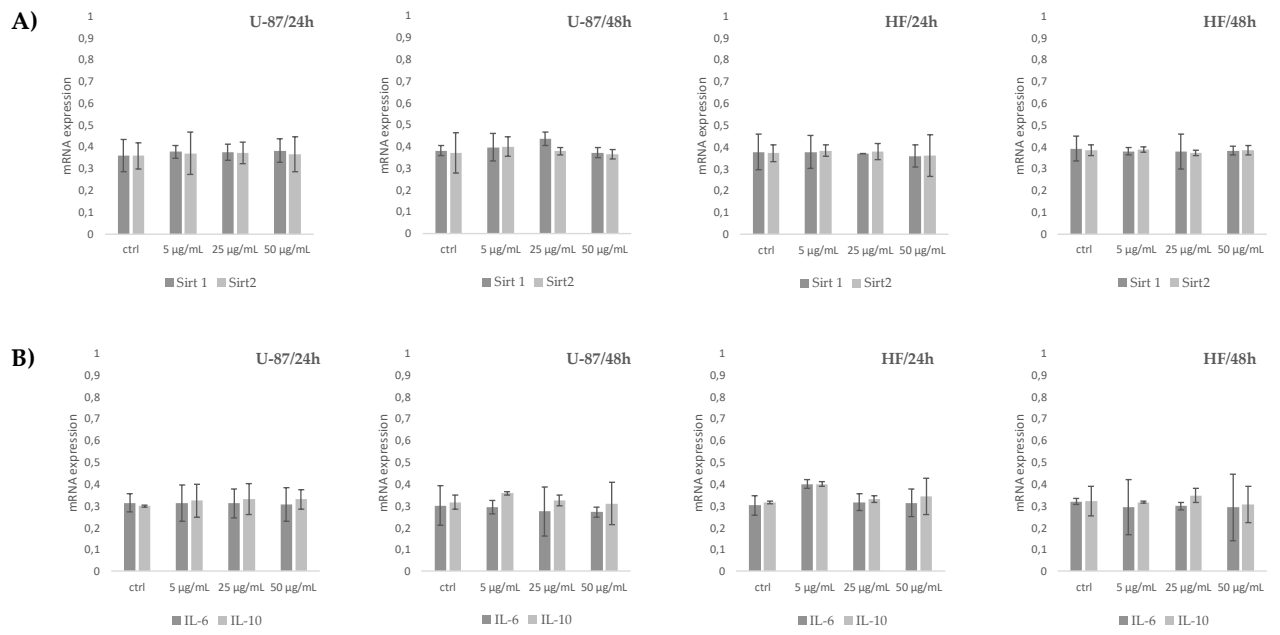

**Figure 22.** A) mRNA expression of Sirt1 and Sirt2 by real-time; B) mRNA expression of IL6 and IL10 by real-time in U-87 and human fibroblast (HF) cells after 24 and 48 h exposure times.
